# Supplementary material
Source: publisher site journal article supplement (https://www.dovepress.com/article/469906)
Supplement: Supplementary file 1 [file get_supplementary_file.php]

Supplementary Materials

#


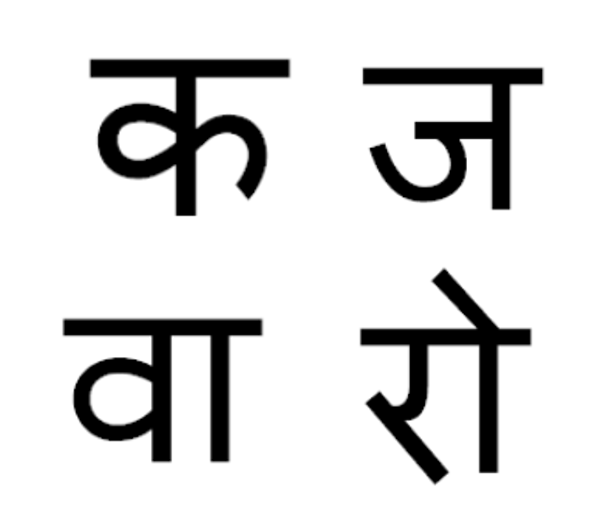


**Supplementary Figure 1** Examples for Sanskrit pictographs used in Study 1.

**Supplementary Table 1** The Representativeness and Word Frequency of Priming Words (Two Chinese Characters) Evaluated by 20 Psychology Students on 5-point Scales in Pilot Experiment.

| **Word** | **Representativeness for affiliation** | **Word**  **frequency** | **Word** | **Representativeness for isolation** | | | **Word**  **frequency** |
| --- | --- | --- | --- | --- | --- | --- | --- |
|  | *M(SD)* | *M(SD)* |  | | *M(SD)* | *M(SD)* | |
| affiliate | 4.70(0.30) | 4.11(0.92) | independent | | 4.15(0.38) | | 4.15(0.83) |
| herding | 4.57(0.44) | 4.15(0.82) | alone | | 4.50(0.33) | 4.75(0.28) | |
| crowd | 4.25(0.38) | 4.78(0.54) | self | | 4.46(0.88) | 4.95(0.27) | |
| follow | 4.46(0.77) | 4.86(0.23) | lone | | 4.22(0.74) | 4.50(0.48) | |
| group | 4.25(0.51) | 4.89(0.49) | individual | | 4.77(0.77) | 4.11(0.96) | |
| along | 4.44(0.66) | 4.57(0.74) | single | | 4.04(0.87) | 4.68(0.69) | |
| conformity | 4.15(0.97) | 4.10(0.91) | isolate | | 4.38(0.93) | 4.47(0.51) | |
| join | 4.13(0.78) | 4.40(0.43） | personal | | 4.15(0.90) | 4.17(0.69) | |

**Notes:** There was no significant difference between the average representativeness (*M*affiliation *(SD)* = 4.26(0.19); *M*isolation*(SD)* = 4.30(0.20); *t* (19) = -.61, *p* = 0.58) and the average word frequency of the two kinds of priming words (*M*affiliation *(SD)* = 4.38(0.23); *M*isolation*(SD)* = 4.44(0.19); *t*(19) = -0.95, *p* = 0.335).
